# Supplementary material for: Relative Importance and Additive Effects of Maternal and Infant Risk Factors on Childhood Asthma
Source: PubMed Central journal article supplement (PMC4803347; doi:10.1371/journal.pone.0151705), 2016-03-22

S1 Fig.

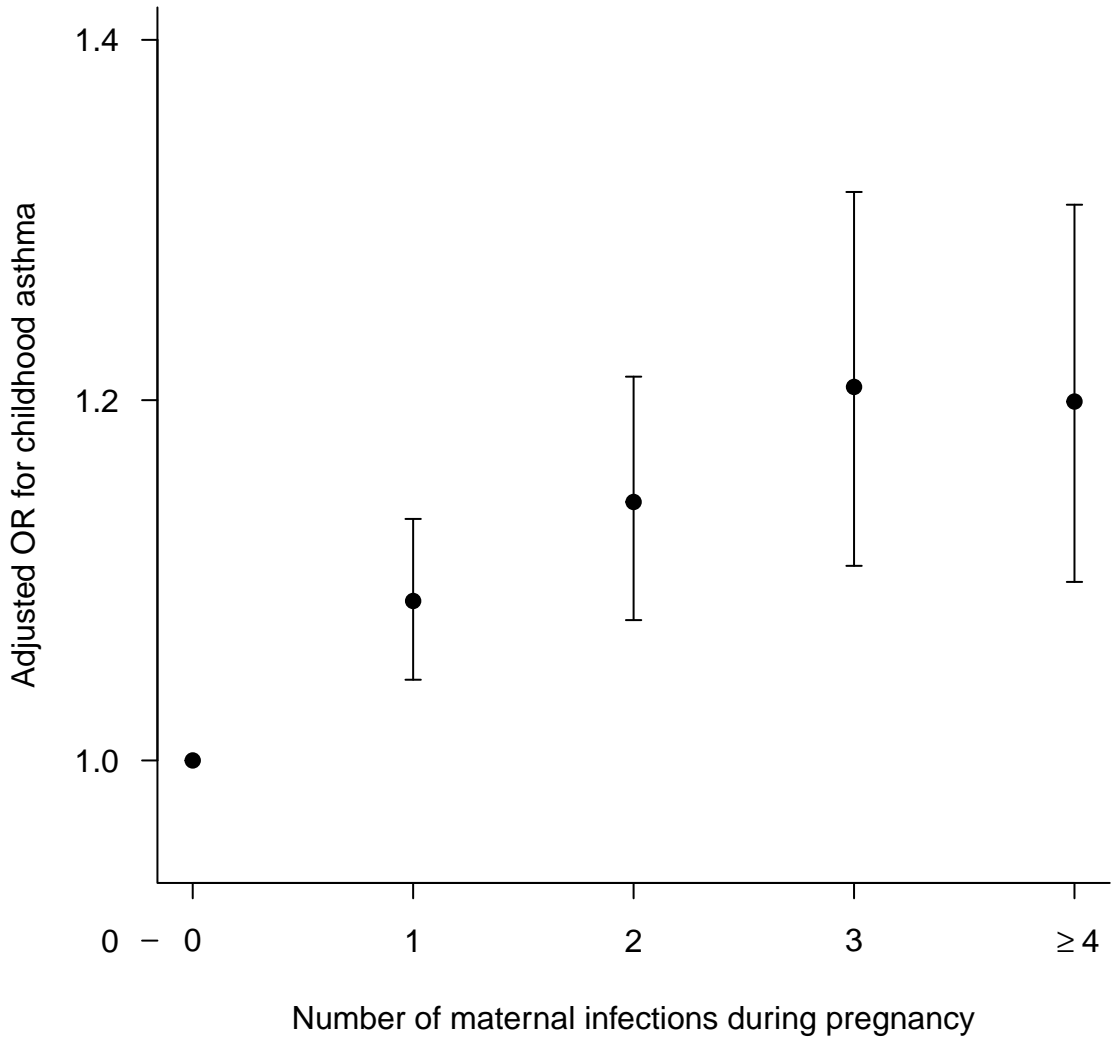

Supplement: pone.0151705.s001.pdf [file pone.0151705.s001.pdf]
