# Supplementary material for: Relative Importance and Additive Effects of Maternal and Infant Risk Factors on Childhood Asthma
Source: PubMed Central journal article supplement (PMC4803347; doi:10.1371/journal.pone.0151705), 2016-03-22
Supplement: pone.0151705.s003.pdf [file pone.0151705.s003.pdf]

### Fraction of asthma variability explained by exposure\*

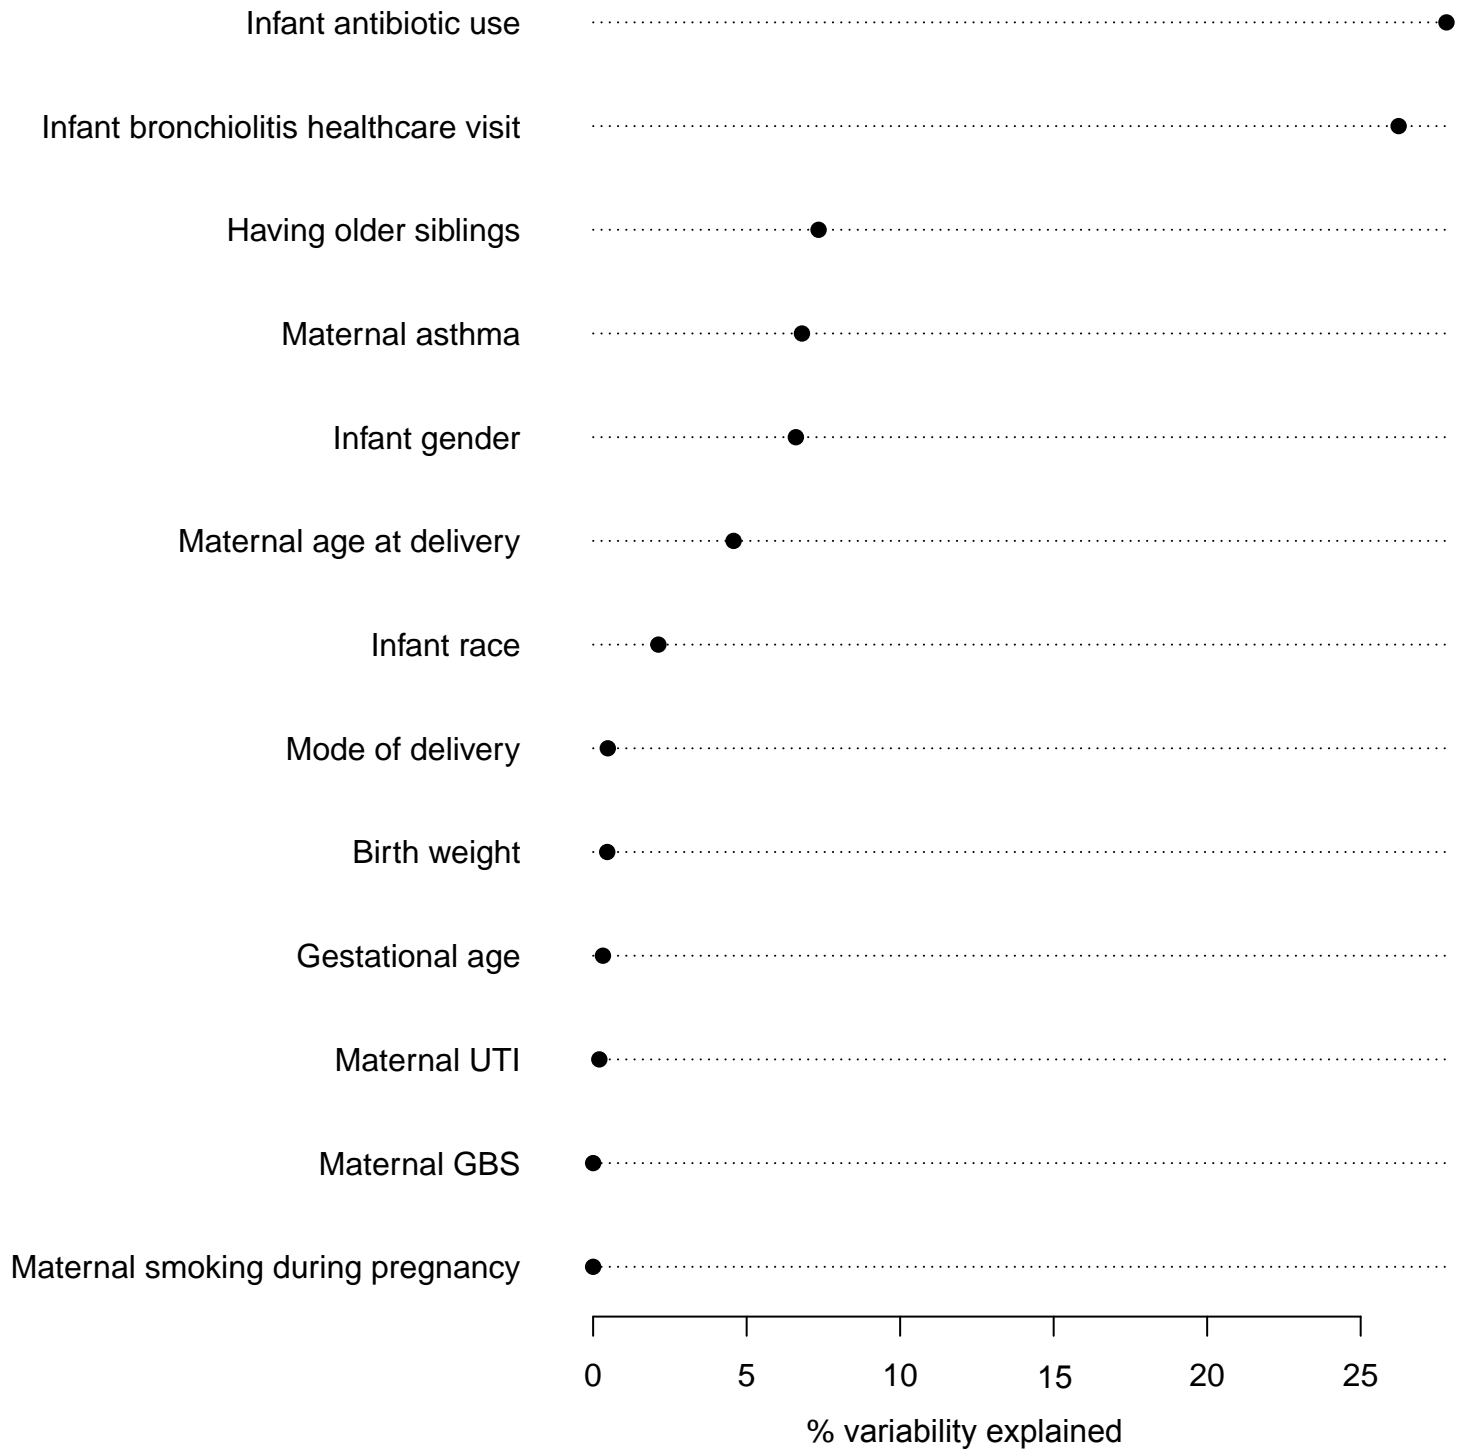

\*Additional risk factors that are not plotted include: birth hospitalization length of stay, birth year, birth month, having chronic lung disease, having congenital heart disease, maternal education, and study site
